# Supplementary material for: Highly dispersed Ni nanoparticles supported by porous Al2O3rods for catalytic dry reforming of methane
Source: Royal Society of Chemistry journal article supplement (doi:10.1039/d3nj01082a), 2023-01-01
Supplement: d3nj01082a1.pdf [file d3nj01082a1.pdf]

*Supporting information for*

# **Synthesis of Porous Al<sub>2</sub>O<sub>3</sub> Rod Supported Ni Nanoparticles for Catalytic Dry Reforming of Methane**

**Kefa Sheng\*, Kai Cui**

**AnHui Province Key Laboratory of Optoelectronic and Magnetism Functional Materials,**

**School of Chemistry and Chemical Engineering, Anqing Normal University,**

**Anqing 246011, China**

E-mail: [kfshengchem@aqnu.edu.cn](mailto:kfshengchem@aqnu.edu.cn)

## **Content**

|                                                                                                                                                                                                                         |   |
|-------------------------------------------------------------------------------------------------------------------------------------------------------------------------------------------------------------------------|---|
| 1. Characterizations .....                                                                                                                                                                                              | 2 |
| 2. SEM and TEM image of AACH rods.....                                                                                                                                                                                  | 3 |
| 3. TEM images of porous Al <sub>2</sub> O <sub>3</sub> rods calcined at 500 °C. NiO-Al <sub>2</sub> O <sub>3</sub> calcined at 500,700 and 900 °C,<br>respectively.....                                                 | 3 |
| 4. Optical images of NiO-Al <sub>2</sub> O <sub>3</sub> calcined at 500, 700 and 900 °C, respectively.....                                                                                                              | 4 |
| 5. XRD pattern and TGA and DSC curve of AACH.....                                                                                                                                                                       | 4 |
| 6. TGA analysis of Ni-Al <sub>2</sub> O <sub>3</sub> -500, Ni-Al <sub>2</sub> O <sub>3</sub> -700 and Ni-Al <sub>2</sub> O <sub>3</sub> -900 catalysts.....                                                             | 5 |
| 7. TEM images of Ni-Al <sub>2</sub> O <sub>3</sub> -500, Ni-Al <sub>2</sub> O <sub>3</sub> -700 and Ni-Al <sub>2</sub> O <sub>3</sub> -900 catalysts after reaction for 6<br>hours.....                                 | 5 |
| 8. Atom concentration of Ni-Al <sub>2</sub> O <sub>3</sub> -700 catalyst from EDS analysis.....                                                                                                                         | 6 |
| 9. The size and interplanar distance of Ni nanoparticles in three kinds of Ni-Al <sub>2</sub> O <sub>3</sub> -500, Ni-Al <sub>2</sub> O <sub>3</sub> -<br>700 and Ni-Al <sub>2</sub> O <sub>3</sub> -900 catalysts..... | 6 |
| 10. The conversions of CH <sub>4</sub> and CO <sub>2</sub> catalyzed by Ni-Al <sub>2</sub> O <sub>3</sub> -500 and Ni-Al <sub>2</sub> O <sub>3</sub> -900 catalysts.....                                                | 7 |
| 11. The Raman spectra of Ni-Al <sub>2</sub> O <sub>3</sub> -700 catalyst after long-term DRM reaction.....                                                                                                              | 7 |
| 12. The FT-IR spectra of Ni-Al <sub>2</sub> O <sub>3</sub> -700 catalyst after long-term DRM reaction.....                                                                                                              | 8 |
| 13. Key words: Ni, Al <sub>2</sub> O <sub>3</sub> rod, Dry reforming of CH <sub>4</sub> .....                                                                                                                           | 8 |
| 14. Comparison of TOF values <sup>‡</sup> of CH <sub>4</sub> and CO <sub>2</sub> catalyzed by Ni-based catalysts in literature.....                                                                                     | 9 |

## 1. Characterizations

The morphologies of Ni-Al<sub>2</sub>O<sub>3</sub> catalysts were characterized by Hitachi S4800 scanning electron microscope (SEM) and FEI Tecnai G2 F30 transmission electron microscope (TEM). The energy-dispersive spectroscopy (EDS) mapping of Ni-Al<sub>2</sub>O<sub>3</sub>-700 catalysts were also measured by F30 TEM under the mode of high-angle annular dark-field scanning transmission electron microscope (HAADF-STEM). Nitrogen adsorption-desorption isotherms, BET (Brunauer-Emmett-Teller) surface areas, BJH (Barret-Joyner-Halenda) pore diameters and total pore volume of Ni-Al<sub>2</sub>O<sub>3</sub> catalysts were measured at 77 K by a Belsorp-Max analyzer. Power X-ray diffraction (XRD) patterns were scanned from 10° to 90° with a speed of 30°/min by Rigaku Ultima IV X-ray diffractometer, which was operated at 35 kV and 40 mA with Ni-filtered Cu-K $\alpha$  radiation as X-ray beam source. The mass percentages of Ni contents supported on porous Al<sub>2</sub>O<sub>3</sub> were measured by a Thermo IRIS Intrepid II XSP inductively coupled plasma-atomic emission spectrometry (ICP-AES). All Temperature programmed reduction (TPR) and Temperature programmed deposition (TPD) experiments of Ni-Al<sub>2</sub>O<sub>3</sub> catalysts were performed on a tp5080 chemical adsorption analyzer equipped with a thermal conductor detector (TCD). X-ray photoelectron spectroscopy (XPS) for surface analysis of Ni-Al<sub>2</sub>O<sub>3</sub> catalysts was performed on AXIS Ultra DLD. Thermogravimetric analysis (TGA) was measured to determine the amount of carbon deposition. Fourier transform infrared spectroscopy (FT-IR) of Ni-Al<sub>2</sub>O<sub>3</sub> catalysts was recorded in the range of 400-4000 cm<sup>-1</sup> by a Nexus 870 FTIR spectrometer. Raman spectra of deposited carbon on used Ni-Al<sub>2</sub>O<sub>3</sub>-700 catalysts were measured by a Thermo Scientific DXR2 Raman Microscope equipped with a

**2. SEM and TEM image of AACH rods.**

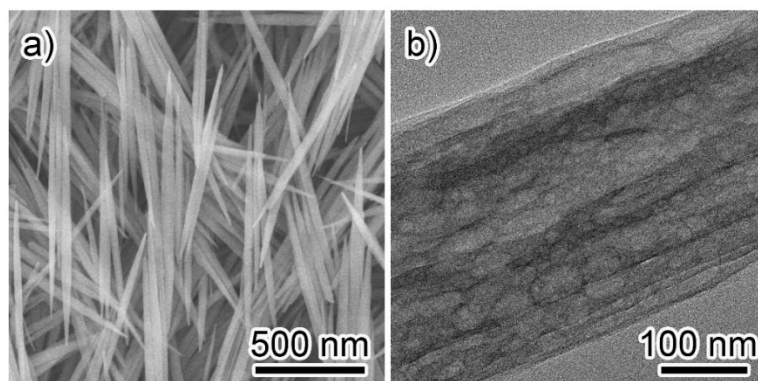

**Figure S1.** (a) SEM and (b) TEM image of AACH rods.

**3. TEM images of porous  $\text{Al}_2\text{O}_3$  rods calcined at 500 °C.  $\text{NiO-Al}_2\text{O}_3$  calcined at 500,700 and 900 °C, respectively.**

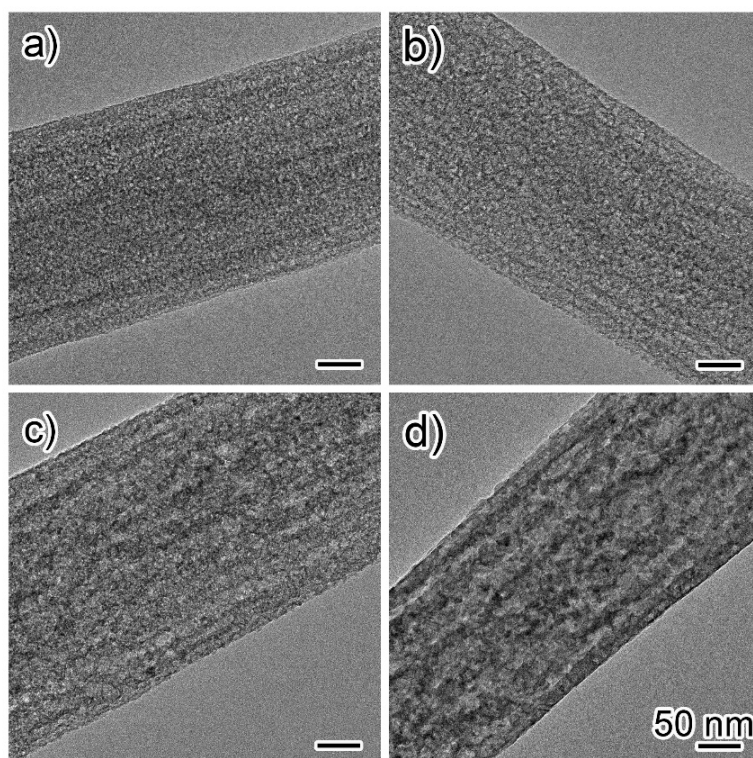

**Figure S2.** TEM images of (a) porous  $\text{Al}_2\text{O}_3$  rods calcined at 500 °C. (b, c, d)  $\text{NiO-Al}_2\text{O}_3$  calcined at 500, 700 and 900 °C, respectively.

4. Optical images of NiO-Al<sub>2</sub>O<sub>3</sub> calcined at 500, 700 and 900 °C, respectively.

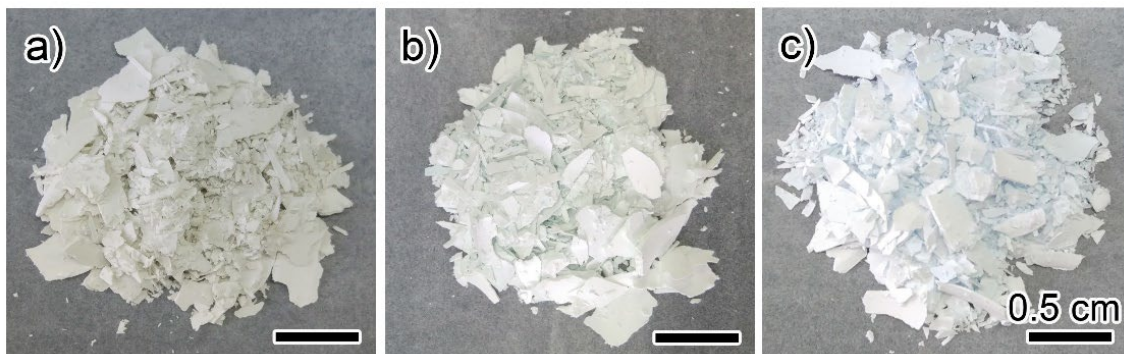

Figure S3. (a, b, c) Optical images of NiO-Al<sub>2</sub>O<sub>3</sub> calcined at 500, 700 and 900 °C, respectively.

5. XRD pattern and TGA and DSC curve of AACH.

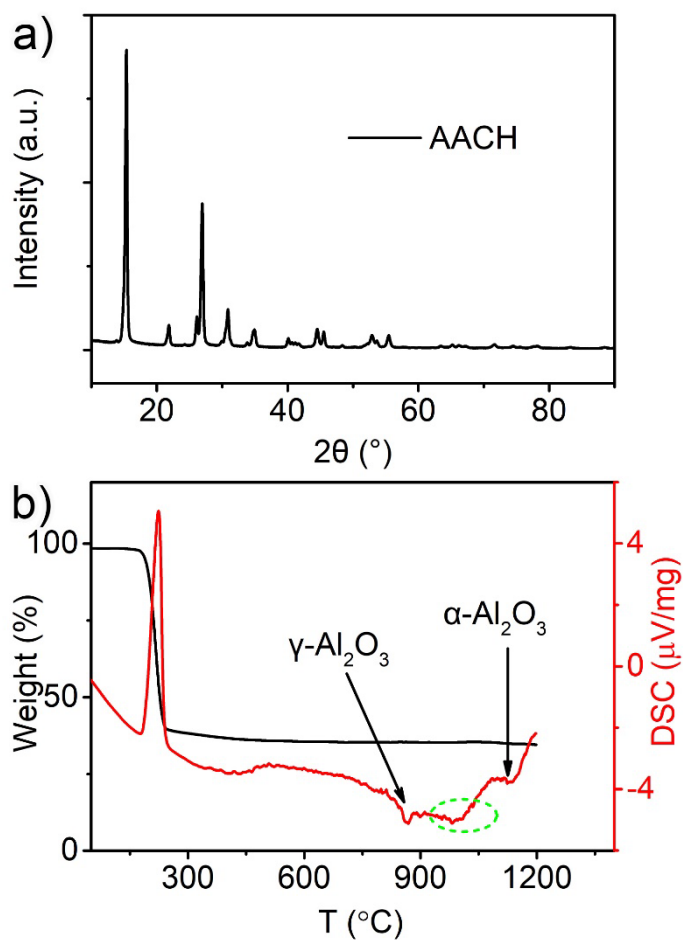

Figure S4. (a) XRD pattern and (b) TGA and DSC curve of AACH.

6. TGA analysis of Ni-Al<sub>2</sub>O<sub>3</sub>-500, Ni-Al<sub>2</sub>O<sub>3</sub>-700 and Ni-Al<sub>2</sub>O<sub>3</sub>-900 catalysts.

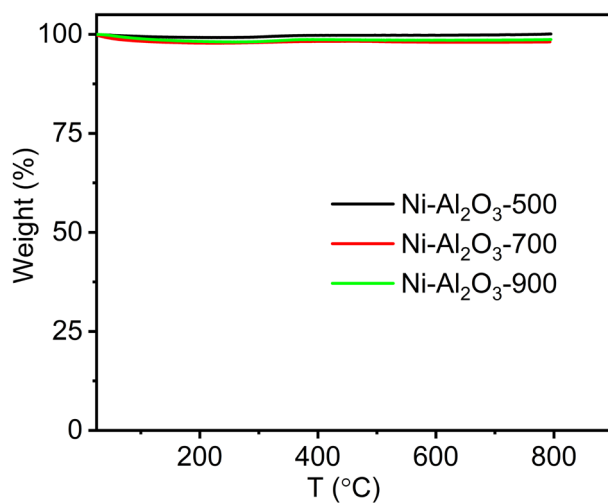

Figure S5. TGA analysis of Ni-Al<sub>2</sub>O<sub>3</sub>-500, Ni-Al<sub>2</sub>O<sub>3</sub>-700 and Ni-Al<sub>2</sub>O<sub>3</sub>-900 catalysts.

7. The conversions of CH<sub>4</sub> and CO<sub>2</sub> catalyzed by Ni-Al<sub>2</sub>O<sub>3</sub>-500 and Ni-Al<sub>2</sub>O<sub>3</sub>-900 catalysts.

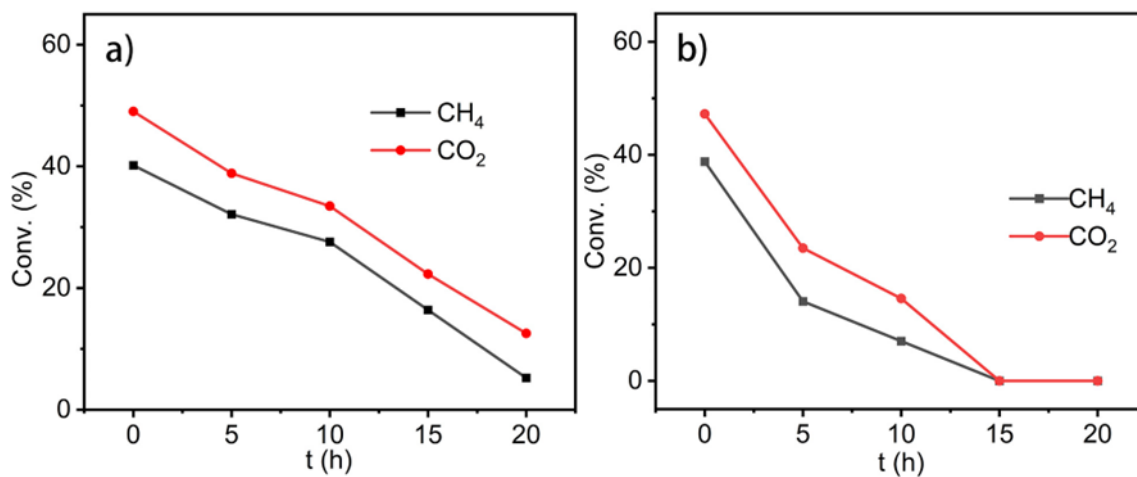

Figure S6. The conversions of CH<sub>4</sub> and CO<sub>2</sub> catalyzed by Ni-Al<sub>2</sub>O<sub>3</sub>-500 and Ni-Al<sub>2</sub>O<sub>3</sub>-900 catalysts.

**8. TEM images of Ni-Al<sub>2</sub>O<sub>3</sub>-500, Ni-Al<sub>2</sub>O<sub>3</sub>-700 and Ni-Al<sub>2</sub>O<sub>3</sub>-900 catalysts after reaction for 6 hours.**

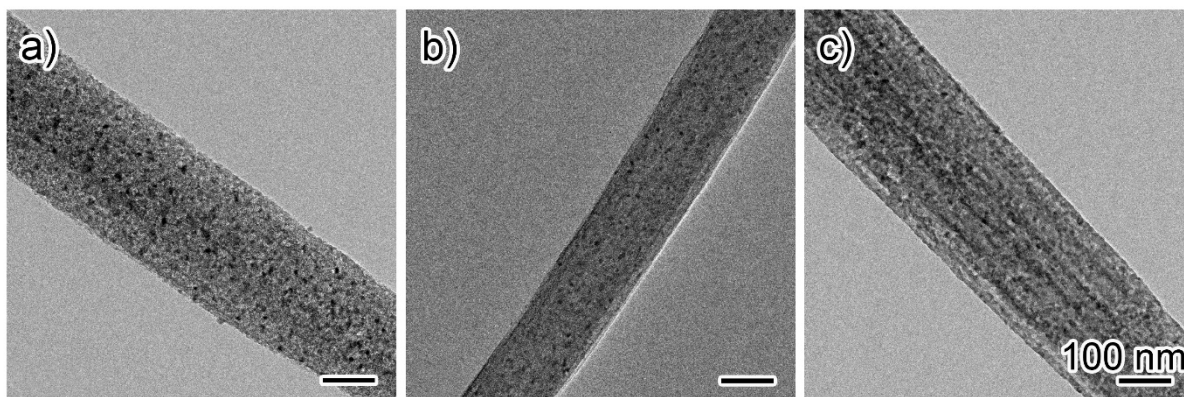

**Figure S7.** TEM images of (a) Ni-Al<sub>2</sub>O<sub>3</sub>-500, (b) Ni-Al<sub>2</sub>O<sub>3</sub>-700 and (c) Ni-Al<sub>2</sub>O<sub>3</sub>-900 catalysts after reaction for 6 hours.

**9. Atom concentration of Ni-Al<sub>2</sub>O<sub>3</sub>-700 catalyst from EDS analysis.**

Table S1. Atom concentration of Ni-Al<sub>2</sub>O<sub>3</sub>-700 catalyst from EDS analysis.

| Element (%) | Weight (%) | Atomic (%) | Uncert (%) |
|-------------|------------|------------|------------|
| O(K)        | 49.07      | 62.40      | 0.09       |
| Al(K)       | 48.94      | 36.90      | 0.07       |
| Ni(K)       | 1.97       | 0.68       | 0.01       |

## 10. The size and interplanar distance of Ni nanoparticles in three kinds of Ni-Al<sub>2</sub>O catalysts.

**Table S2. The size and interplanar distance of Ni nanoparticles in three Ni-Al<sub>2</sub>O<sub>3</sub> catalysts.**

| Sample                                 | Particle size (nm) | d-spacing (nm) |
|----------------------------------------|--------------------|----------------|
| Ni-Al <sub>2</sub> O <sub>3</sub> -500 | 5.16               | 0.203          |
| Ni-Al <sub>2</sub> O <sub>3</sub> -700 | 2.86               | 0.203          |
| Ni-Al <sub>2</sub> O <sub>3</sub> -900 | /                  | /              |

†The crystallite sizes were calculated from XRD data using the Scherrer equation and full width at half-maxima of (111) diffraction peaks from XRD patterns.

$$D = \frac{K\lambda}{\beta \cos\theta}$$

Where D=crystallites size (nm), K=0.94 (Scherrer constant),  $\lambda=0.15406$  nm (wavelength of the X-ray sources),  $\beta$ =FWHM (radians),  $\theta$ =Peak position (radians).

† The d-spacing was calculated from XRD data using Bragg's equation.

$$n\lambda = 2d\sin\theta \quad \text{or} \quad d = \frac{n\lambda}{2\sin\theta}$$

Where  $\lambda=0.15406$  nm (wavelength of the X-ray sources),  $\theta$ =Peak position (in radians), n=1 (order of diffraction), d=d-spacing (in nm). Both  $\theta$  and  $\beta$  use radian data.

11. The Raman spectra of Ni-Al<sub>2</sub>O<sub>3</sub>-700 catalyst after long-term DRM reaction.

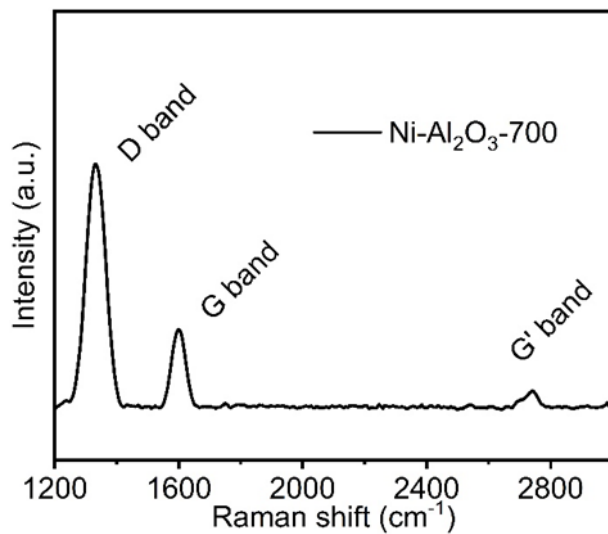

Figure S8. The Raman spectra of Ni-Al<sub>2</sub>O<sub>3</sub>-700 catalyst after long-term DRM reaction.

12. The FT-IR spectra of Ni-Al<sub>2</sub>O<sub>3</sub>-700 catalyst after long-term DRM reaction.

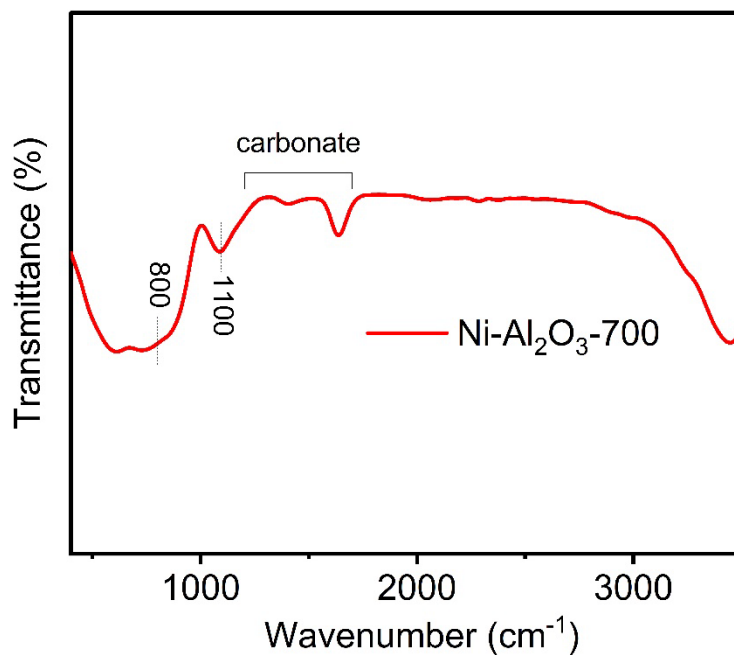

Figure S9. The FT-IR spectra of Ni-Al<sub>2</sub>O<sub>3</sub>-700 catalyst after long-term DRM reaction.

13. **Key words:** Ni nanoparticle, Al<sub>2</sub>O<sub>3</sub> rod, Dry reforming of CH<sub>4</sub>, stronger metal-support interaction (SMSI)



#### 14. Comparison of TOF values‡ of CH<sub>4</sub> and CO<sub>2</sub> catalyzed by Ni-based catalysts in literature.

**Table S3.** Comparison of TOF values‡ of CH<sub>4</sub> and CO<sub>2</sub> catalyzed by Ni-based catalysts in literature

| Ni-based catalyst                                                 | T (°C) | GHSV (L·g <sub>cat</sub> <sup>-1</sup> ·h <sup>-1</sup> ) | TOF <sub>CH<sub>4</sub> ini.</sub> (s <sup>-1</sup> ) | TOF <sub>CO<sub>2</sub> ini.</sub> (s <sup>-1</sup> ) | Ref.                                                           |
|-------------------------------------------------------------------|--------|-----------------------------------------------------------|-------------------------------------------------------|-------------------------------------------------------|----------------------------------------------------------------|
| Ni-La-Mg-Al                                                       | 600    | 24                                                        | 0.013                                                 | 0.017                                                 | Int. J. Hydrogen Energy 2018, 43, 19438–19450.                 |
| Ni-La <sub>2</sub> O <sub>3</sub> -Al <sub>2</sub> O <sub>3</sub> | 800    | 14.4                                                      | 0.012                                                 | 0.104                                                 | Int. J. Hydrogen Energy 2019, 44, 24510–24524.                 |
| Ni-Al <sub>2</sub> O <sub>3</sub>                                 | 700    | 120                                                       | 0.402                                                 | 0.376                                                 | Chem. Commun., 2015, 51, 12044--12047                          |
| NiO-CaO-Al <sub>2</sub> O <sub>3</sub>                            | 750    | 30.3                                                      | 0.340                                                 | 0.353                                                 | ACS Catal. 2012, 2, 1331–1342                                  |
| Ni-Ce-Al Oxide                                                    | 700    | 18                                                        | 0.131                                                 | 0.135                                                 | ACS Catal. 2013, 3, 1638–1651                                  |
| NiMgAl-LDH@m-SiO <sub>2</sub>                                     | 750    | 3.75                                                      | 0.028                                                 | 0.029                                                 | Chem. Commun., 2013, 49, 6770--6772                            |
| CoNi/Al <sub>2</sub> O <sub>3</sub> -CeZrO <sub>2</sub>           | 700    | 6                                                         | 0.144                                                 | 0.128                                                 | Ind. Eng. Chem. Res. 2015, 54, 3775–3787                       |
| Ni <sub>15</sub> CeMgAl                                           | 800    | 24                                                        | 0.023                                                 | 0.023                                                 | Applied Catalysis B: Environmental 254 (2019) 612–623          |
| Ni/ZrO <sub>2</sub>                                               | 750    | 25                                                        | 0.075                                                 | 0.083                                                 | Applied Catalysis B: Environmental 302 (2022) 120859           |
| 1.5CeO <sub>2-x</sub> -NSNT                                       | 750    | 96                                                        | 0.116                                                 | /                                                     | Applied Catalysis B: Environmental 277 (2020) 119278           |
| Ni/CeO <sub>2</sub>                                               | 800    | 30                                                        | 0.627                                                 | 0.735                                                 | Applied Catalysis B: Environmental 268 (2020) 118387           |
| RhNi-MgAl <sub>2</sub> O <sub>4</sub>                             | 600    | 18                                                        | 0.256                                                 | 0.310                                                 | International journal of hydrogen energy 48 (2023) 13890e13901 |
| Ni-Al <sub>2</sub> O <sub>3</sub> -500                            | 700    | 275                                                       | 0.227                                                 | 0.279                                                 | <b>This work</b>                                               |
| Ni-Al <sub>2</sub> O <sub>3</sub> -900                            | 700    | 275                                                       | 0.230                                                 | 0.287                                                 | <b>This work</b>                                               |
| Ni-Al <sub>2</sub> O <sub>3</sub> -700                            | 700    | 275                                                       | 0.378                                                 | 0.421                                                 | <b>This work</b>                                               |

‡ TOF values in literature and this work were calculated by the molar amount of converted CH<sub>4</sub>/CO<sub>2</sub> and that of metal Ni. The TOF was calculated according to the following formulas, where the molar amount of gas (n) was calculated from its initial flow rate and conversion, and the molar amount of Ni was calculated by the mass of the catalyst, the weight percentage of Ni (wt%) from ICP-AES and its

molecular weight (M).

$$\begin{aligned} \text{TOF (CH}_4/\text{CO}_2) &= n (\text{CH}_4/\text{CO}_2) / [n (\text{Ni}) \times t] \\ &= [r (\text{CH}_4/\text{CO}_2)_{\text{in}} \times \text{Conv. (CH}_4/\text{CO}_2) \times t / 22.4] / [m (\text{cat}) \times \text{wt\% (Ni)} \times t / M (\text{Ni})]. \end{aligned}$$
